# Supplementary material for: Mesenchymal stromal cells-derived matrix Gla protein contribute to the alleviation of experimental colitis
Source: Cell Death Dis. 2018 Jun 7;9(6):691. doi: 10.1038/s41419-018-0734-3 (PMC5992143; doi:10.1038/s41419-018-0734-3)
Supplement: Supplementary file 1 — Supplementary material [file 41419_2018_734_MOESM1_ESM.pdf]

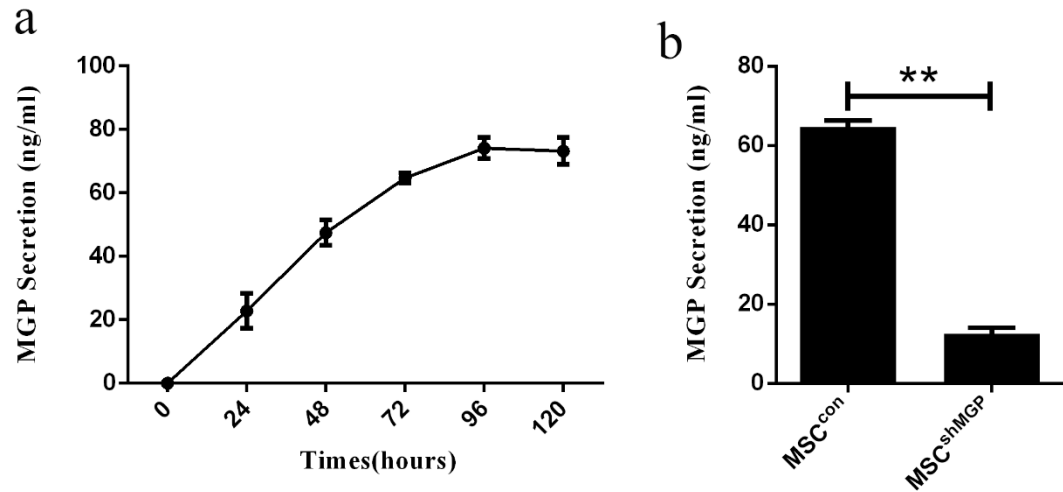

**Figure S1. The MGP secretion levels of MSCs were detected by ELISA.** (a) The dynamic changes of MSC-secreted MGP among five days. (b) The comparison of MGP secretion between MSC<sup>con</sup> and MSC<sup>shMGP</sup> after 72 hours' culture. Data are shown as mean  $\pm$  SEM (n = 3). \*\*P < 0.01.

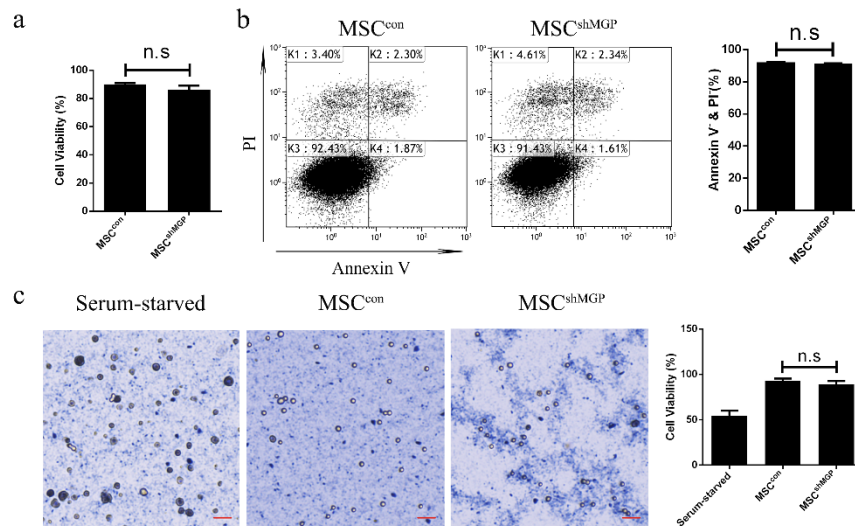

**Figure S2. The viability of MSCs was not obviously influenced by the down-regulation of MGP.** The proliferation of MSCs was evaluated using the CCK-8 kit (a). The apoptosis of MSCs was evaluated by measuring Annexin V and PI levels (b) and trypan blue staining (c). Cell viability of MSCs were compared using serum-starvation assay by culturing cells without serum for 48h. Data are shown as mean  $\pm$  SEM (n = 3). Scale bar = 50  $\mu$ m, and n.s. means no significant.

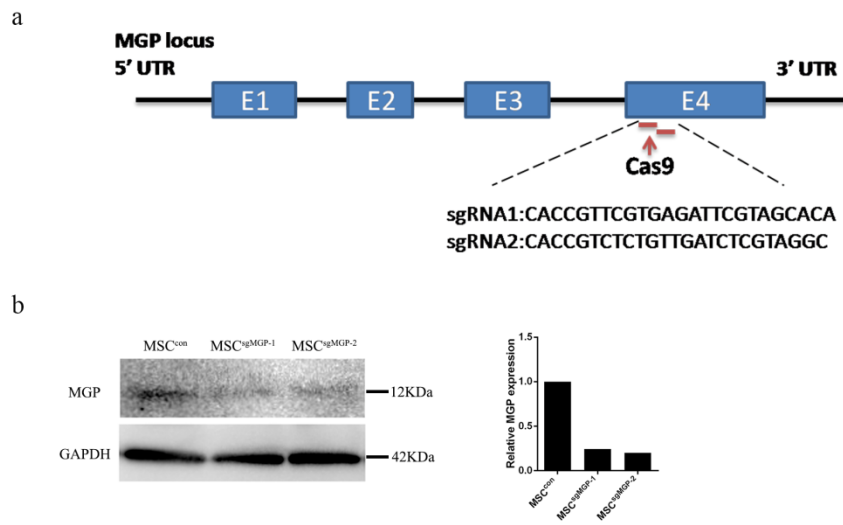

**Figure S3. Generation of MGP knockout MSCs.** (a) sgRNA/Cas9 was used for long-term MGP knockout in mouse MSCs. (b) The efficiency of sgRNA-mediated down-regulation of MGP was assessed at the protein level. The expression of GAPDH was used as a control.

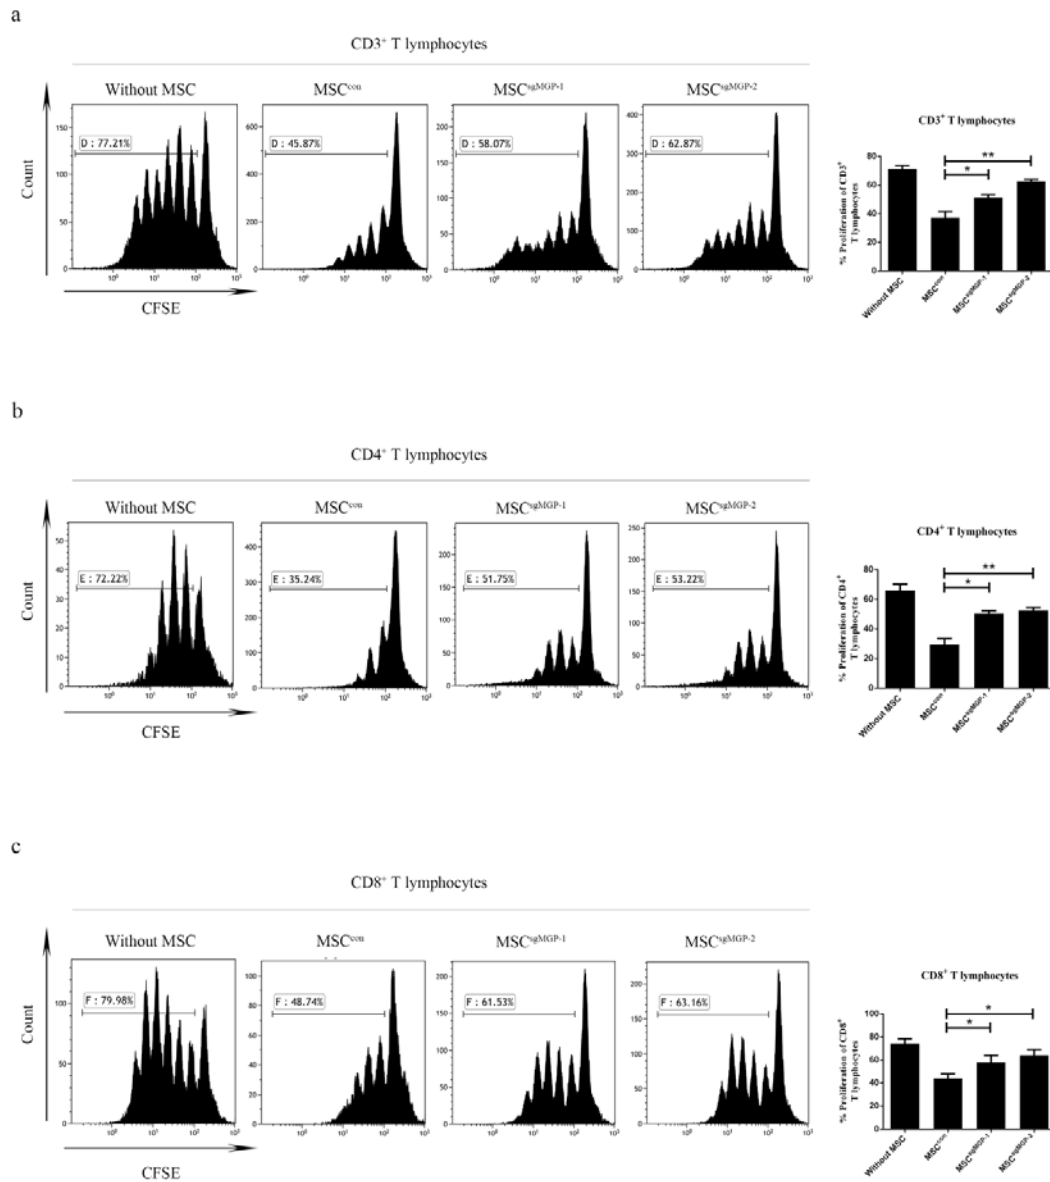

**Figure S4. Mouse MSCs-derived MGP inhibits the proliferation of activated T-cells in vitro (verified by CRISPR interference).** The proliferation levels of mouse CD3<sup>+</sup> T-cells (a), CD4<sup>+</sup> T-cells (b) and CD8<sup>+</sup> T-cells (c) were analyzed by flow cytometry; the change of CFSE fluorescence intensity indicates the growth ratio. Data are shown as mean  $\pm$  SEM (n = 3). \*P < 0.05, \*\*P < 0.01, \*\*\*P < 0.001, and n.s. means no significant.

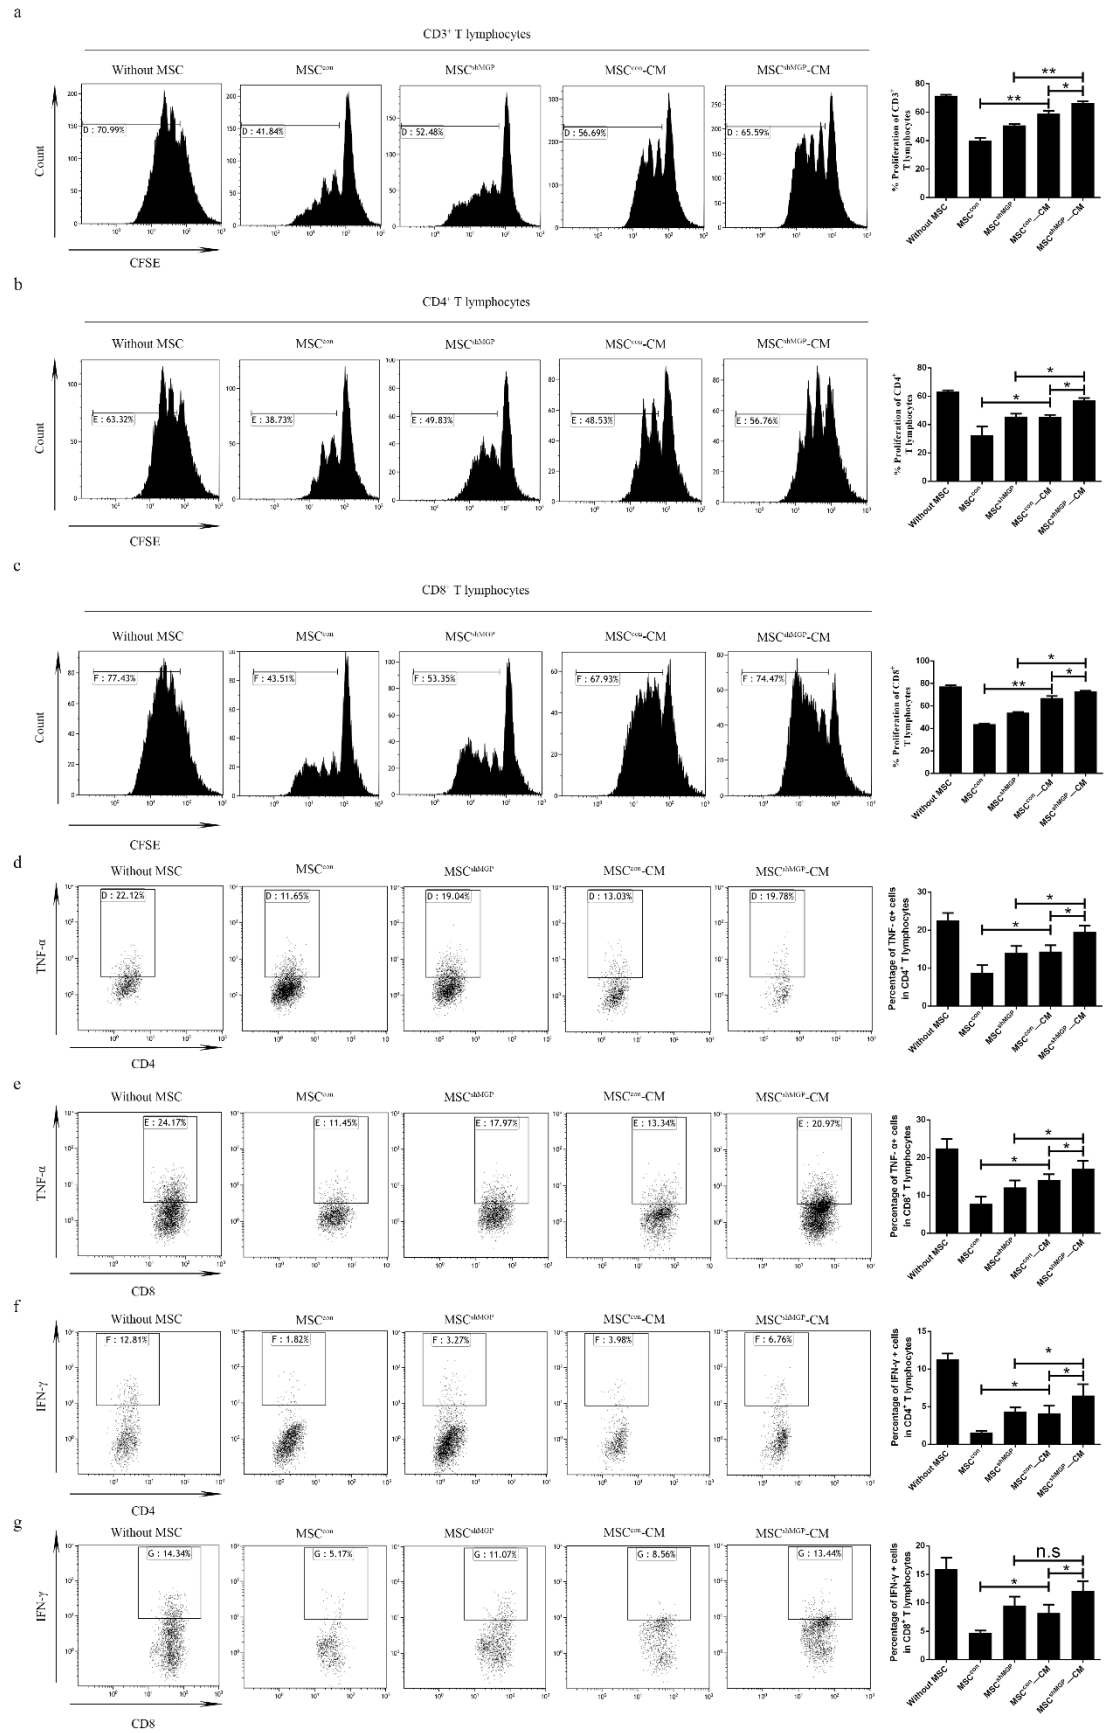

**Figure S5. MGP contributes to T-cells immunoregulation of MSCs through a**

**paracrine manner.** The proliferation levels of mouse CD3<sup>+</sup> T-cells (a), CD4<sup>+</sup> T-cells (b) and CD8<sup>+</sup> T-cells (c) were analyzed by flow cytometry; the change of CFSE fluorescence intensity indicates the growth ratio. Flow cytometry was used to analyze the expression levels of TNF- $\alpha$  and IFN- $\gamma$  in CD4<sup>+</sup> T-cells (d and f, respectively) and CD8<sup>+</sup> T-cells (e and g, respectively) after 3 days of co-culture with MSCs or MSCs-CM only. Data are shown as mean  $\pm$  SEM (n = 5). \*P < 0.05, \*\*P < 0.01, and n.s. means no significant.

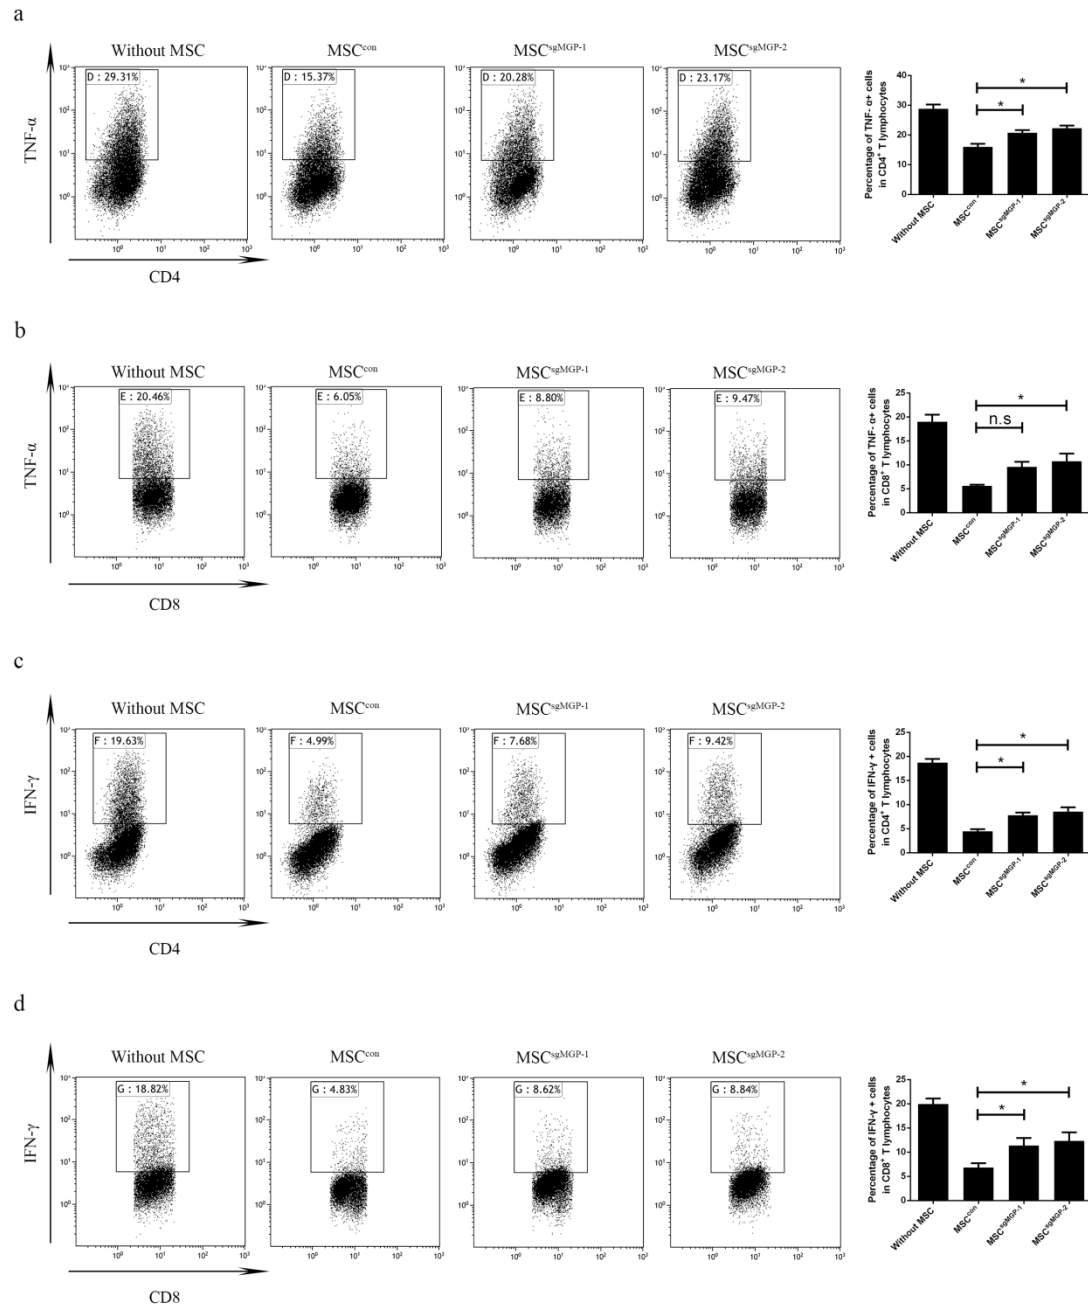

**Figure S6. Mouse MSCs-derived MGP down-regulates the cytokine production of activated T-cells (verified by CRISPR interference).** Flow cytometry was applied to analyze the expression levels of TNF- $\alpha$  and IFN- $\gamma$  in CD4<sup>+</sup> T-cells (a and c, respectively) and CD8<sup>+</sup> T-cells (b and d, respectively) after 3 days of co-culture with MSCs. Data are shown as mean  $\pm$  SEM (n = 3). \*P < 0.05, and n.s. means no significant.

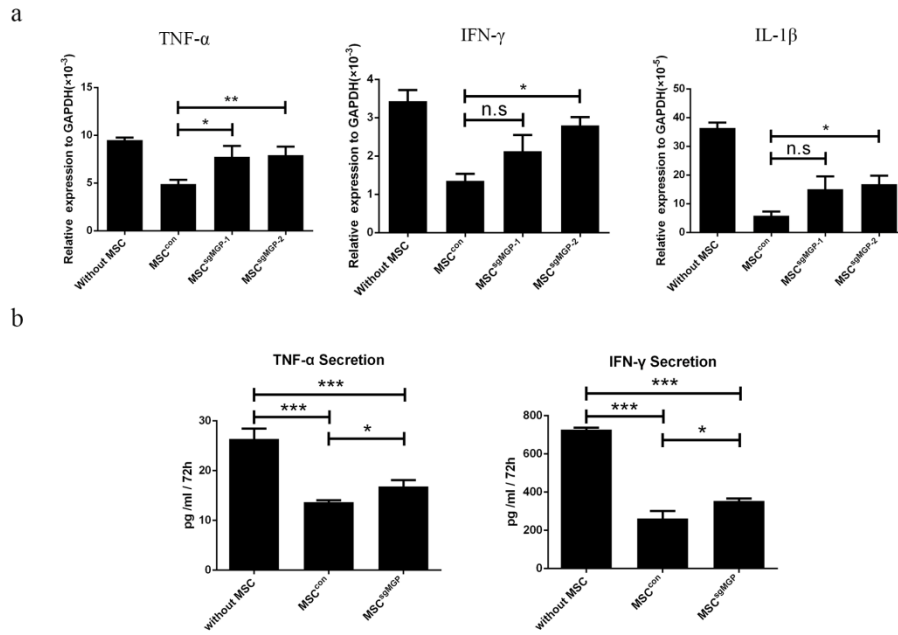

**Figure S7. MSCs (MSC<sup>con</sup> and MSC<sup>sgMGP</sup>) suppress the cytokine expression and secretion via MGP.** (a) The expression levels of pro-inflammation cytokines (TNF- $\alpha$ , IFN- $\gamma$  and IL-1 $\beta$ ) were analyzed at the mRNA level. (b) The secretion levels of pro-inflammation cytokines (TNF- $\alpha$  and IFN- $\gamma$ ) were analyzed by ELISA. Data are shown as mean  $\pm$  SEM (n = 3). \*P < 0.05, \*\*P < 0.01, \*\*\*P < 0.001, and n.s. means no significant.

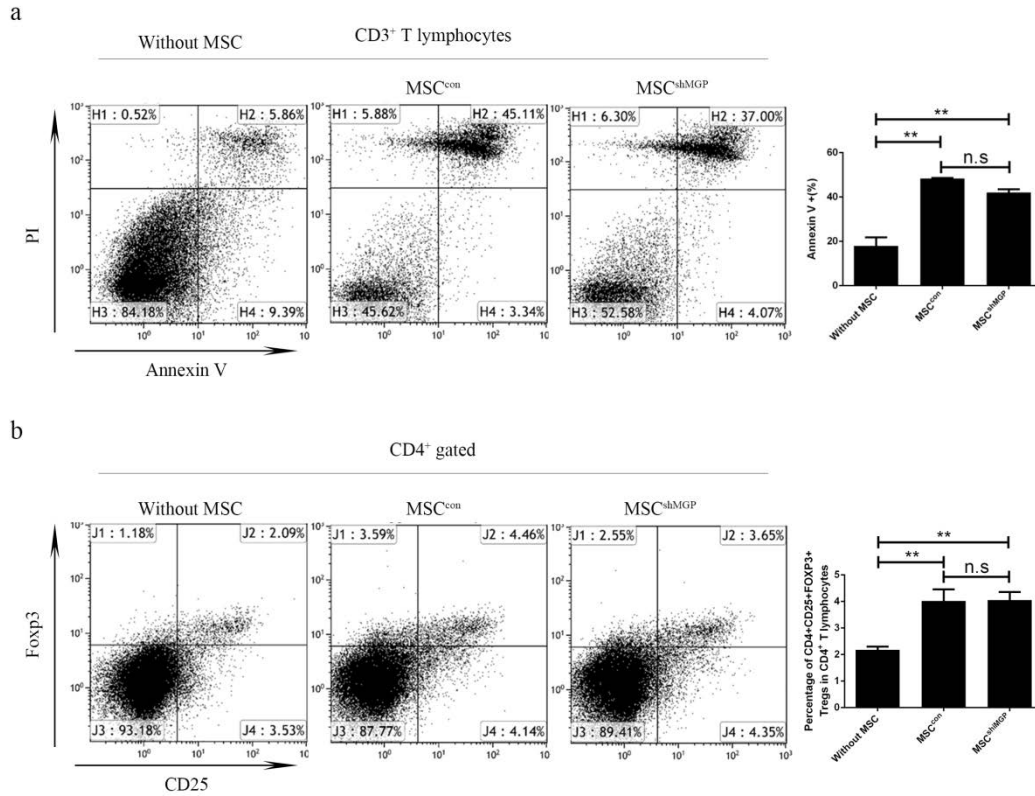

**Figure S8. MSCs do not influence the apoptosis of activated T-cells and the differentiation of CD4<sup>+</sup>CD25<sup>+</sup>FoxP3<sup>+</sup>Tregs through MGP.** (a) After 3 days of co-culture with or without MSCs, CD3<sup>+</sup> T-cells were analyzed for apoptosis using flow cytometry. (b) The proportion of the Treg was analysed by flow cytometry 2 days after T-cells co-culture with MSCs. Data are shown as mean  $\pm$  SEM (n = 3). \*\*P < 0.01, and n.s. means no significant.

**Table S1. Primers used for the amplification of mouse transcripts by qPCR**

| Genes         | Forward sequence                 | Reverse sequence                  |
|---------------|----------------------------------|-----------------------------------|
| GAPDH         | 5'-ACCACAGTCCATGCCATCAC-3'       | 5'-TCCACCACCCTGTTGCTGTA-3'        |
| MGP           | 5'-AGGAACGCAACAAGCCTGC<br>CTA-3' | 5'-CTGCCTGAAGTAGCGGTTG<br>TAG-3'  |
| TNF- $\alpha$ | 5'-GGTGCCTATGTCTCAGCCT<br>CTT-3' | 5'-GCCATAGAACTGATGAGAGG<br>GAG-3' |
| IL-6          | 5'-TACCACTTCACAAGTCGGA<br>GGC-3' | 5'-CTGCAAGTGCATCATCGTTG<br>TTC-3' |
| IL-1 $\beta$  | 5'-TGGACCTTCCAGGATGAGG<br>ACA-3' | 5'-GTTTCATCTCGGAGCCTGTA<br>GTG-3' |
| IL-10         | 5'-CGGGAAGACAATAACTGCA<br>CCC-3' | 5'-CGGTTAGCAGTATGTTGTCC<br>AGC-3' |
| IL-17         | 5'-CAGACTACCTCAACCGTTC<br>CAC-3' | 5'-TCCAGCTTTCCCTCCGCAT<br>TGA-3'  |

**Table S2. MGP shRNA sequence used to generate lentivirus plasmids for RNA silencing**

|         | Oligonucleotide (5'to3')                                  |
|---------|-----------------------------------------------------------|
| Forward | TGGAGAAATGCCAACACCTTCTTCCTGTCAAAGGTGTTGGCATTCTCCTTTTTTC   |
| Reverse | TCGAGAAAAAAGGAGAAATGCCAACACCTTTGACAGGAAGAAGGTGTTGGCATTCTC |

|  |    |
|--|----|
|  | CA |
|--|----|

**Table S3. MGP sgRNA sequence used to generate lentivirus plasmids for gene silencing**

|     |         | Oligonucleotide (5'to3')  |
|-----|---------|---------------------------|
| sg1 | Forward | CACCGTTCGTGAGATTCGTAGCACA |
|     | Reverse | AAACTGTGCTACGAATCTCACGAAC |
| sg2 | Forward | CACCGTCTCTGTTGATCTCGTAGGC |
|     | Reverse | AAACGCCTACGAGATCAACAGAGAC |
